# Supplementary material
Source: PubMed Central journal article supplement (PMC9090788)
Supplement: 41598_2022_11700_MOESM1_ESM.pdf [file 41598_2022_11700_MOESM1_ESM.pdf]

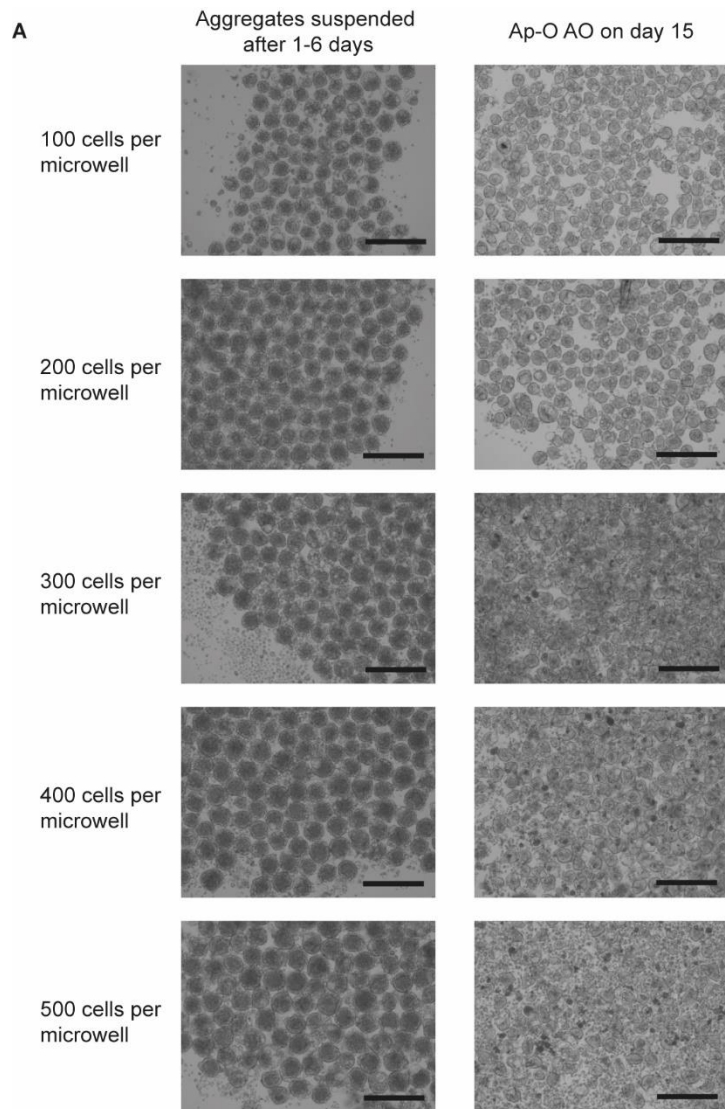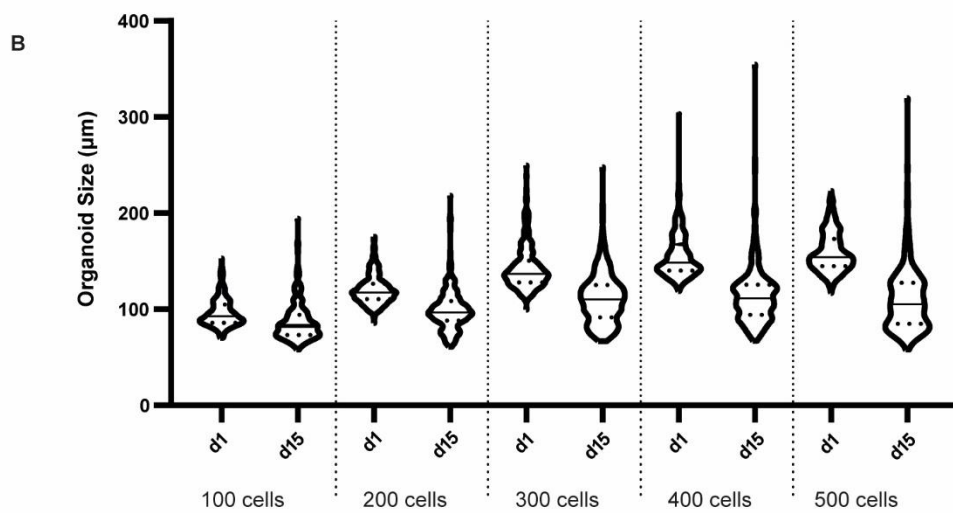

Supplementary Figure 1: **Optimization of the microwell seeding density**

- A. Brightfield images of different cell densities seeded in AggreWell directly after suspension (day 1-6) and at the end of the differentiation protocol (day 15). Cell shedding can be observed from larger aggregates (scale bars = 300  $\mu\text{m}$ ).
- B. Violin plots of the Feret diameters from aggregates after transfer to suspension culture and Ap-O AO at day 15 using different initial seeding densities per microwell. Dotted lines represent the quartiles, straight lines represent the median. Exactly 100 Ap-O AO were measured per donor for each condition (n = 3).

Supplementary Video 1: **Apical-out Airway organoids display visible beating cilia on the outer side.**

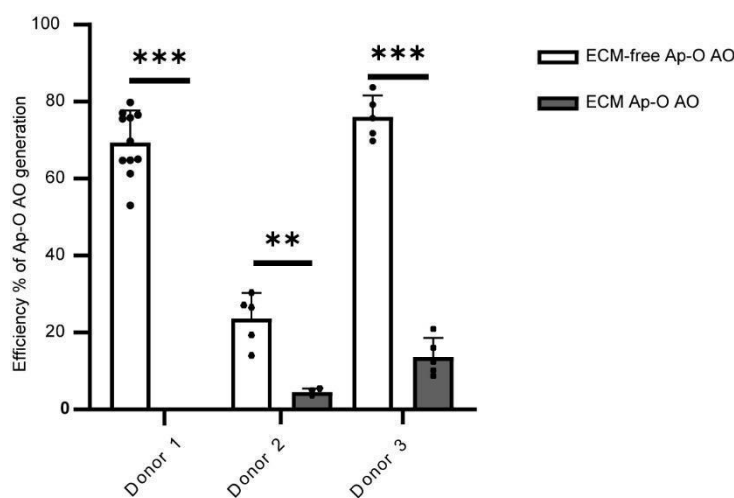

Supplementary Figure 2: **Comparison of the apical out airway organoid generation efficiency**

Ap-O AO forming efficiency following aggregate generation and suspension culture of ECM-embedded organoids. Samples labelled ECM-Free Ap-O AO indicate apical-out organoids generated with our ECM-free method; samples labelled ECM Ap-O AO indicate apical-out organoids generated using the method published by Salahudeen *et al*<sup>13</sup>. Efficiency was calculated as the number of aggregates or organoids prior to initiation of the suspension culture divided by the number of formed Ap-O AO at end point. Points represent technical replicates. Data are presented as mean  $\pm$  SD of at least 5 independent technical replicates. P value is calculated by unpaired Students' t-test. Single asterisks indicate  $p < 0.05$ , double asterisks  $p < 0.01$  and three asterisks  $p < 0.001$ .

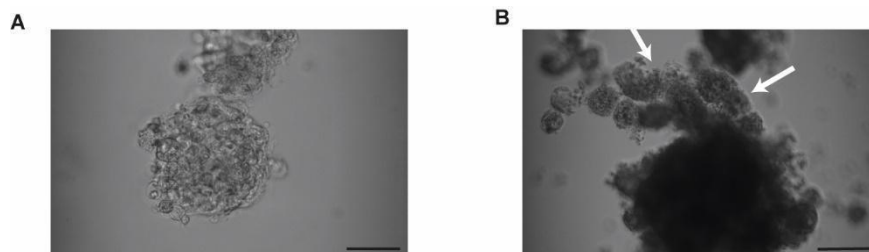

Supplementary Figure 3: **Representative images of ECM-embedded organoids after ECM removal and suspension culture**

- A. Representative brightfield image of a deteriorating ECM-derived organoid in suspension culture (scale bar = 50  $\mu\text{m}$ ).
- B. Brightfield image showing a large airway organoid derived from organoid-organoid fusion. White arrows indicate organoids that are fused but not completely merged (scale bar = 200  $\mu\text{m}$ ).

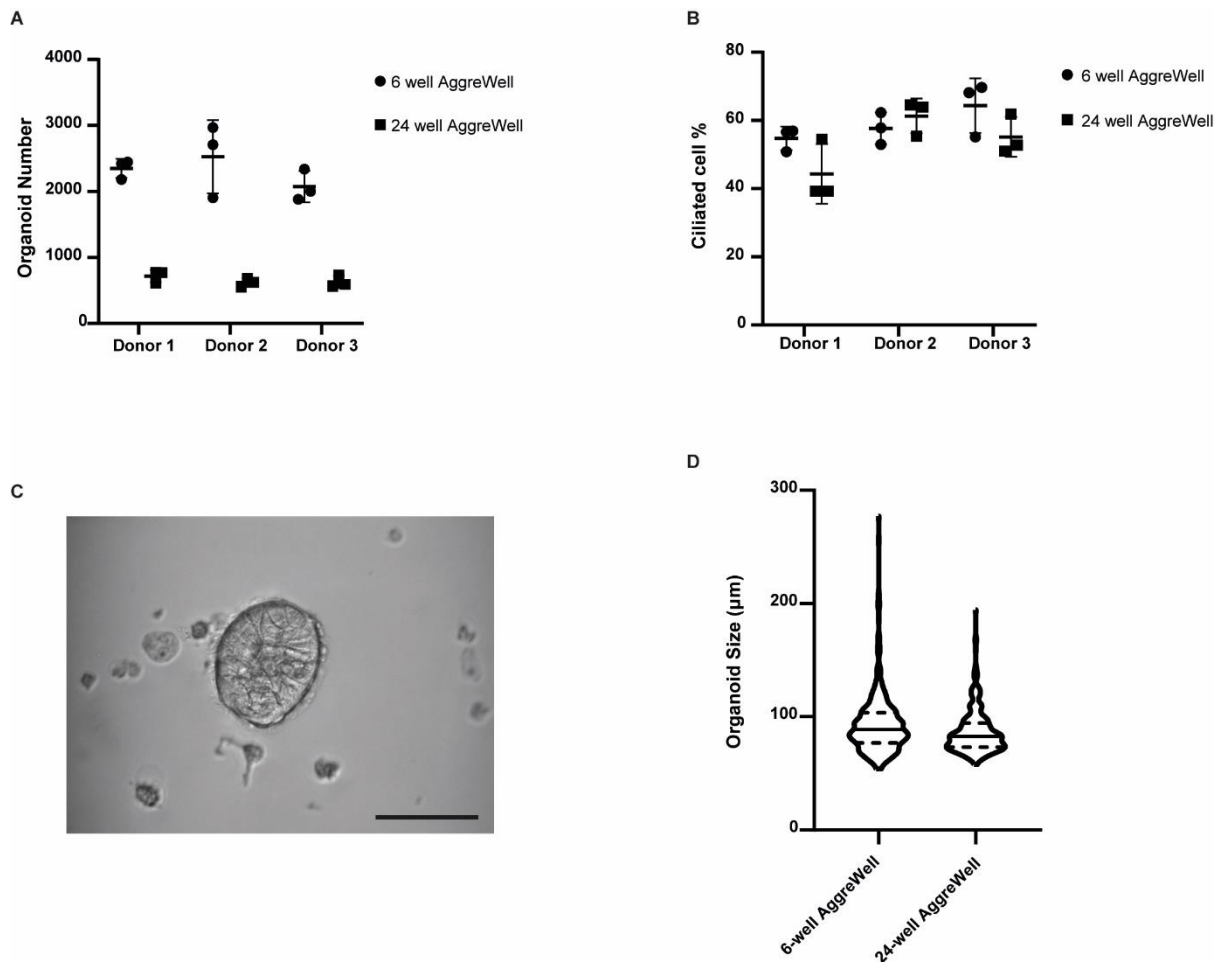

Supplementary Figure 4: **Comparison of Ap-O AO generated from 24 and 6 well AggreWell plates**

- A. Number of generated organoids per well of 6 and 24-well AggreWell plate across three different donors. Data points represent independent wells ( $n = 3$ ).
- B. Ciliated cell percentage of generated Ap-O AO at day 15 from 6 and 24-well AggreWell plates. Data points represent measurements taken from independent wells of a 24-well plate ( $n = 3$ ).
- C. Representative brightfield image of terminally differentiated Ap-O AO at day 15 from 6-well AggreWell plate (scale bar 75  $\mu\text{m}$ ).
- D. Violin plots depicting the frequency of different Feret diameters in p5 Ap-O AO from 3 donors generated in 6 or 24-well AggreWell plates. Dotted lines represent the quartiles, straight lines represent the median. 100 organoids were equally counted from 3 wells for each donor and plate format.

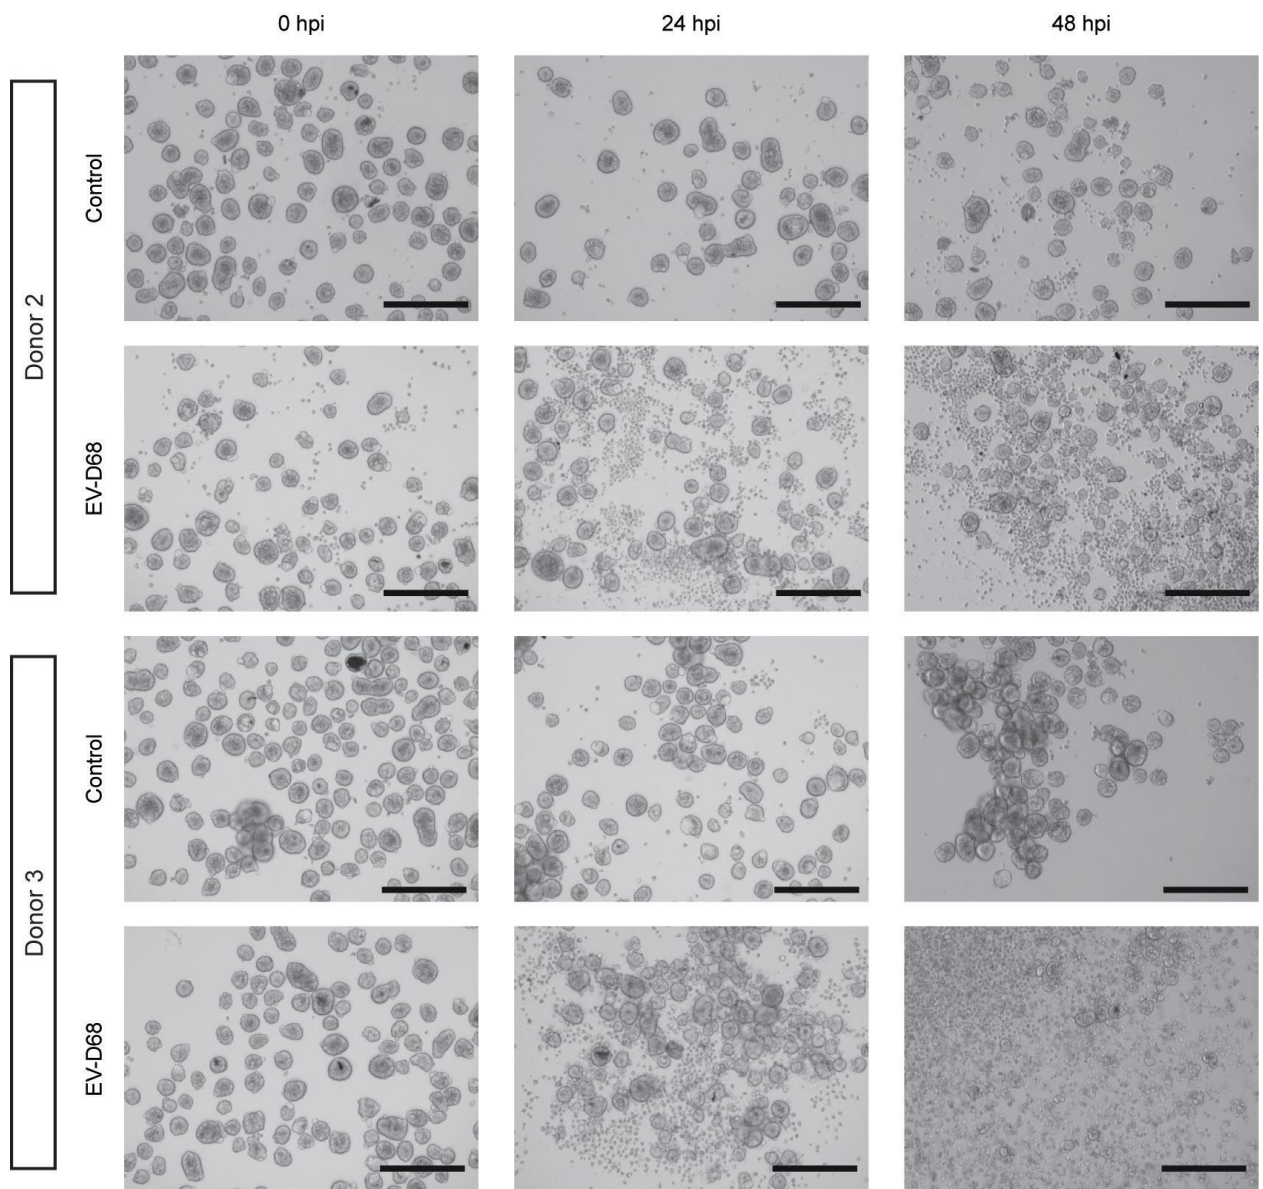

Supplementary Figure 5: **CPE observed in donors 2 and 3.**

Representative brightfield images showing the cytopathologic effect of EV-D68 infection over 48 hours in the remaining 2 donors (scale bars = 300  $\mu$ m).

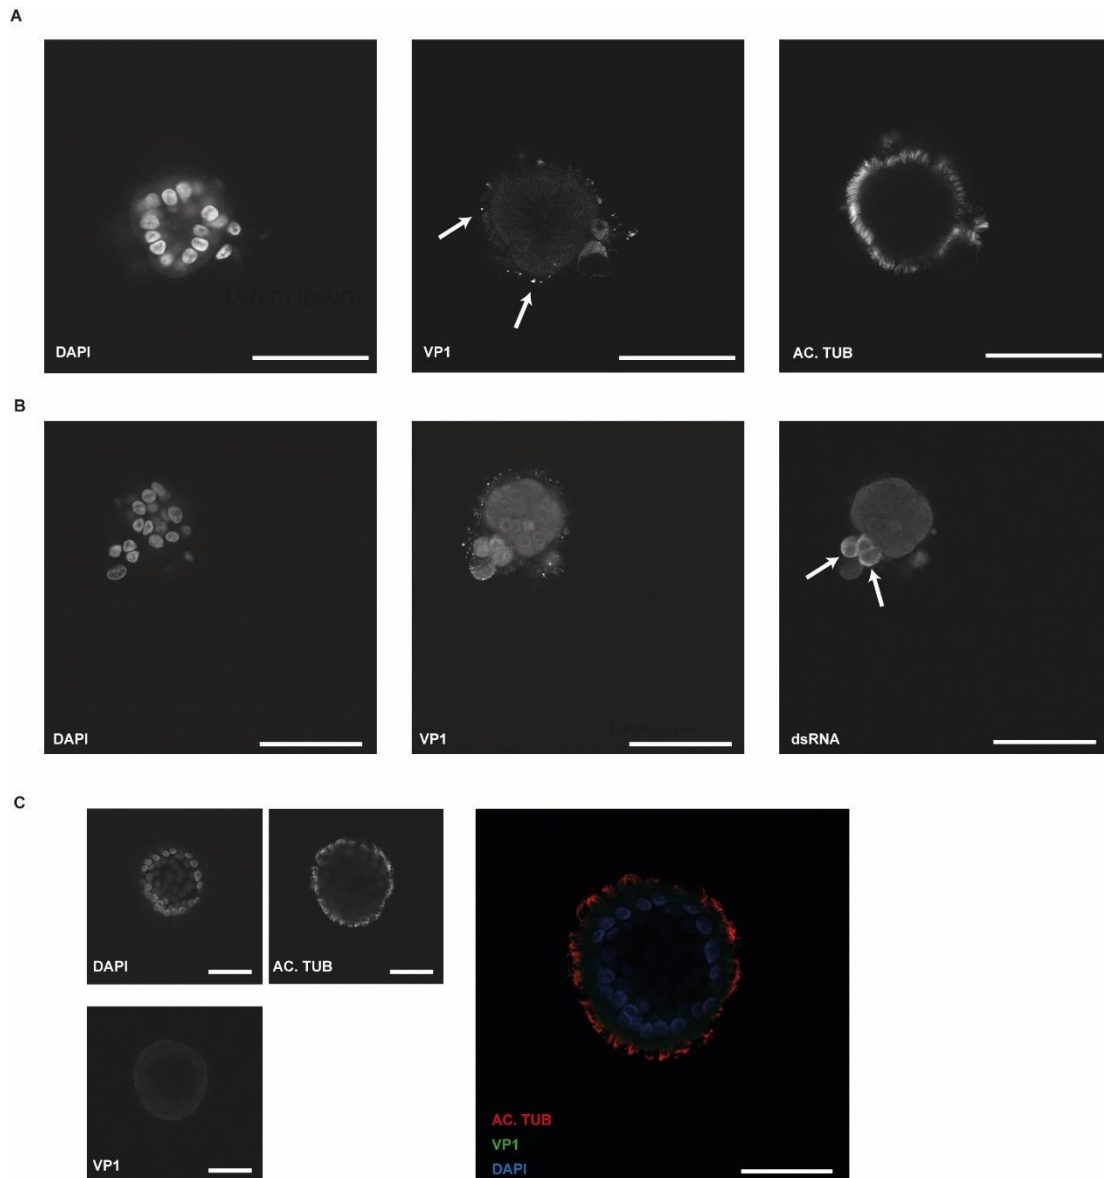

**Supplementary Figure 6: ICC images of Ap-O AO infected with EV-D68**

- A. Single-channel images showing the distribution of DAPI, VP1 and AC. TUB in Ap-O AO after 0 hpi with EV-D68. Arrows point at bound viral particles (scale bars = 50  $\mu$ m).
- B. Single-channel images showing the distribution of DAPI, VP1 and dsRNA from Ap-O AO after 6 hpi with EV-D68. Arrows point at infected cells with ongoing replication (scale bars = 50  $\mu$ m).
- C. Single-channel and merged images showing the distribution of DAPI, VP1 and AC. TUB in non-infected Ap-O AO (scale bars = 50  $\mu$ m).

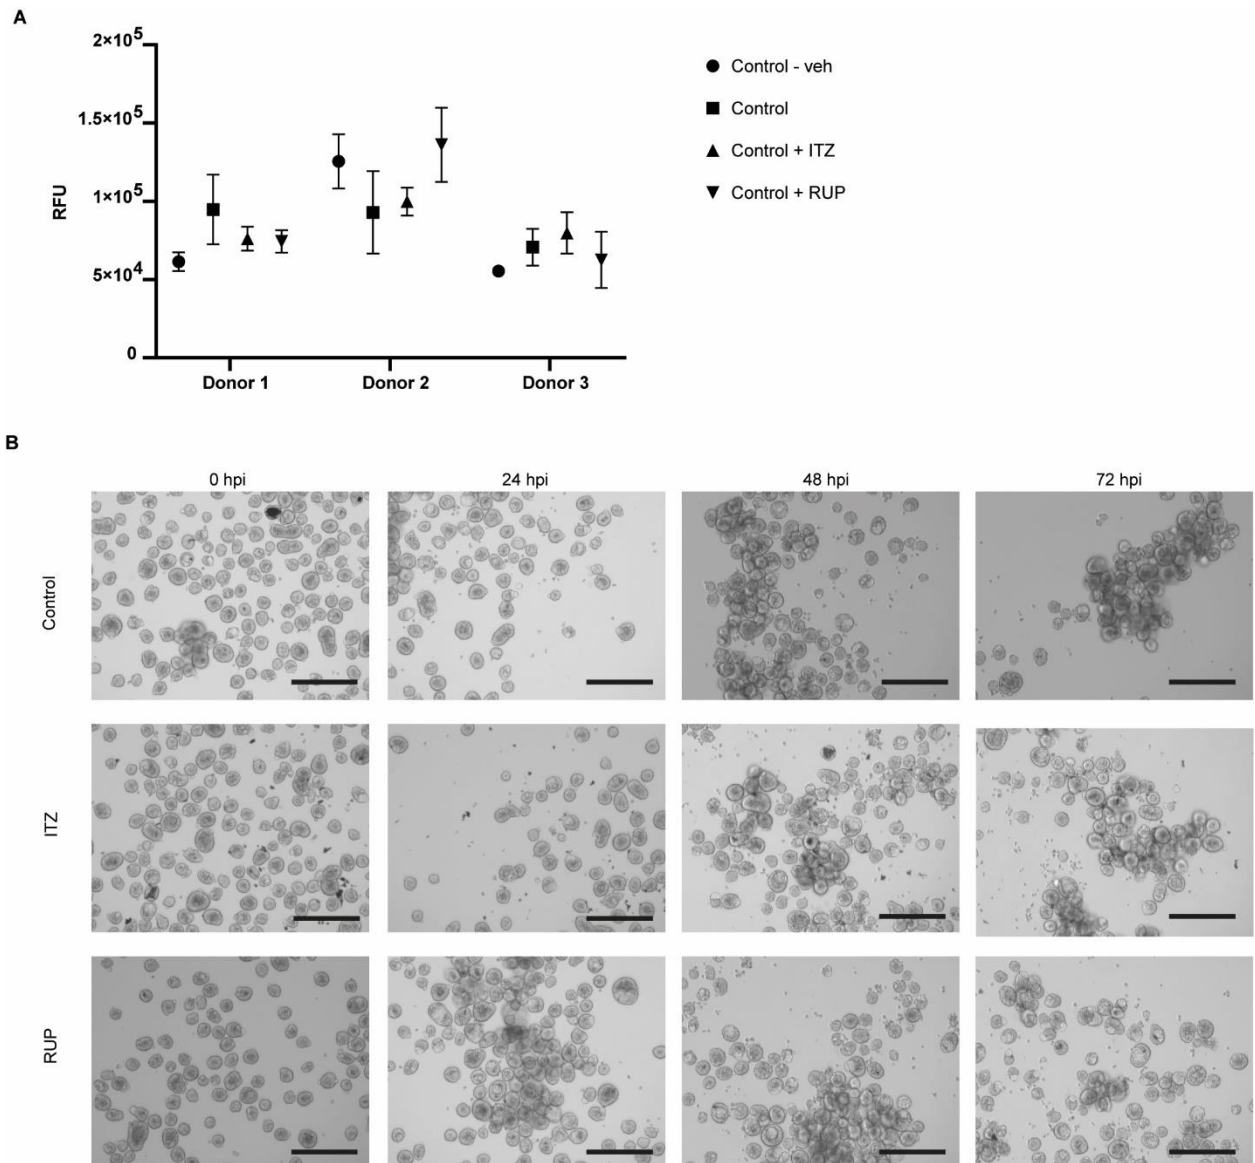

**Supplementary Figure 7: Effect of ITZ and RUP in Ap-O AO**

A. Relative Fluorescent Units (RFU) indicating changes in viability of Ap-O AO following addition of ITZ or RUP for 72 hours. Single points represent technical replicates. Bars depict the mean with SEM (n = 3).

B. Morphology of Ap-O AO following addition of Itraconazole or Rupintrivir. Morphological changes could not be observed following addition of the antivirals (scale bars = 300  $\mu$ m).
